# Supplementary material
Source: ML conference proceedings conference paper supplement (https://openaccess.thecvf.com/content/ICCV2023/html/Asanomi_MixBag_Bag-Level_Data_ICCV_2023_paper.html)
Supplement: Supplementary file 1 [file Asanomi_MixBag_Bag-Level_Data_ICCV_2023_supplemental.pdf]

| Method     | $\gamma$ -sampling | CIFAR10 Accuracy | SVHN Accuracy | PATH Accuracy | OCT Accuracy | BLOOD Accuracy | ORGANA Accuracy | ORGANC Accuracy | ORGANS Accuracy | Average Accuracy |
|------------|--------------------|------------------|---------------|---------------|--------------|----------------|-----------------|-----------------|-----------------|------------------|
| LLP        | –                  | 0.4538           | 0.3009        | 0.7843        | 0.4336       | 0.8869         | 0.7635          | 0.7898          | 0.5372          | 0.6187           |
| LLP + Ours | uniform            | 0.5256           | 0.3742        | 0.7861        | 0.4347       | 0.9017         | 0.7971          | 0.8099          | 0.6197          | <b>0.6561</b>    |
| LLP + Ours | gauss              | 0.5162           | 0.3710        | 0.7853        | 0.4307       | 0.8980         | 0.7867          | 0.7937          | 0.6283          | 0.6512           |
| LLP + Ours | half               | 0.5060           | 0.3774        | 0.7819        | 0.4400       | 0.8912         | 0.8050          | 0.8015          | 0.6164          | 0.6524           |

Table 1. Average accuracy on eight datasets when changing a sampling method for  $\gamma$ . Note that this table corresponds to Table 3 in the main paper, which shows the average accuracy of all datasets. All sampling methods outperformed the performance compared to the baseline method (LLP); ‘uniform’ was marginally better than other methods.

| Method          | CIFAR10 Accuracy | SVHN Accuracy | PATH Accuracy | OCT Accuracy | BLOOD Accuracy | ORGANA Accuracy | ORGANC Accuracy | ORGANS Accuracy | Average Accuracy |
|-----------------|------------------|---------------|---------------|--------------|----------------|-----------------|-----------------|-----------------|------------------|
| LLP             | 0.4538           | 0.3009        | 0.7843        | 0.4336       | 0.8869         | 0.7635          | 0.7898          | 0.5372          | 0.6187           |
| LLP + Ours(99%) | 0.5256           | 0.3742        | 0.7861        | 0.4347       | 0.9017         | 0.7971          | 0.8099          | 0.6197          | <b>0.6561</b>    |
| LLP + Ours(95%) | 0.5267           | 0.3807        | 0.7913        | 0.4227       | 0.8852         | 0.8034          | 0.8012          | 0.6046          | 0.6519           |
| LLP + Ours(80%) | 0.5069           | 0.4015        | 0.8004        | 0.4004       | 0.8947         | 0.8104          | 0.7970          | 0.6142          | 0.6531           |
| LLP + Ours(50%) | 0.4781           | 0.3493        | 0.7611        | 0.4019       | 0.8676         | 0.7794          | 0.8008          | 0.5562          | 0.6243           |

Table 2. Accuracy on each dataset when changing the degree of confidence interval (50%, 80%, 95%, 99%). Note that this table corresponds to Table 4 in the main paper, which shows the average accuracy of all datasets. LLP + Ours(99%) was superior to the baseline LLP in all datasets.

| Method             | Size | Num | CIFAR10 Accuracy | SVHN Accuracy | PATH Accuracy | OCT Accuracy | BLOOD Accuracy | ORGANA Accuracy | ORGANC Accuracy | ORGANS Accuracy | Average Accuracy |
|--------------------|------|-----|------------------|---------------|---------------|--------------|----------------|-----------------|-----------------|-----------------|------------------|
| LLP                | 10   | 512 | 0.4538           | 0.3009        | 0.7843        | 0.4336       | 0.8869         | 0.7635          | 0.7898          | 0.5372          | 0.6187           |
| LLP + Ours(w/o CI) | 10   | 512 | 0.4582           | 0.2971        | 0.7884        | 0.4250       | 0.8898         | 0.7831          | 0.8189          | 0.563           | 0.6280           |
| LLP + Ours         | 10   | 512 | 0.5256           | 0.3742        | 0.7861        | 0.4347       | 0.9017         | 0.7971          | 0.8099          | 0.6197          | <b>0.6561</b>    |
| LLP                | 20   | 256 | 0.3301           | 0.2217        | 0.7339        | 0.3778       | 0.8527         | 0.6936          | 0.7034          | 0.4396          | 0.5441           |
| LLP + Ours(w/o CI) | 20   | 256 | 0.3286           | 0.2217        | 0.7223        | 0.4080       | 0.8650         | 0.7064          | 0.7270          | 0.4182          | 0.5496           |
| LLP + Ours         | 20   | 256 | 0.3705           | 0.2305        | 0.7521        | 0.3876       | 0.8687         | 0.7312          | 0.7435          | 0.4499          | <b>0.5667</b>    |
| LLP                | 40   | 128 | 0.2727           | 0.2042        | 0.6870        | 0.3790       | 0.8061         | 0.5669          | 0.5422          | 0.3386          | 0.4746           |
| LLP + Ours(w/o CI) | 40   | 128 | 0.2579           | 0.2141        | 0.6968        | 0.351        | 0.7995         | 0.5357          | 0.5059          | 0.3191          | 0.4600           |
| LLP + Ours         | 40   | 128 | 0.3162           | 0.2034        | 0.7002        | 0.3836       | 0.8167         | 0.6249          | 0.6168          | 0.3847          | <b>0.5058</b>    |

Table 3. Average accuracy on eight datasets when changing the number of labeled bags and bag size. ‘Size’ means the bag size. ‘Num’ means the number of labeled bags. Note that this table corresponds to Table 5 in the main paper, which shows the average accuracy of all datasets. LLP + Ours was superior to the baseline LLP in all datasets under every bag size and the number of labeled bags.

| Method              | Bag-Generation | CI | CIFAR10 Accuracy | SVHN Accuracy | PATH Accuracy | OCT Accuracy | BLOOD Accuracy | ORGANA Accuracy | ORGANC Accuracy | ORGANS Accuracy | Average Accuracy |
|---------------------|----------------|----|------------------|---------------|---------------|--------------|----------------|-----------------|-----------------|-----------------|------------------|
| LLP                 | –              | –  | 0.4538           | 0.3009        | 0.7843        | 0.4336       | 0.8869         | 0.7635          | 0.7898          | 0.5372          | 0.6187           |
| LLP + Ours(w/o CI)  | Union          | –  | 0.4575           | 0.3252        | 0.7710        | 0.4014       | 0.8882         | 0.7884          | 0.7887          | 0.5600          | 0.6226           |
| LLP + Ours(w/o CI)  | Sub-bag        | –  | 0.3155           | 0.2331        | 0.6221        | 0.4182       | 0.7587         | 0.6035          | 0.5836          | 0.4305          | 0.4956           |
| LLP + Ours(with CI) | Sub-bag        | ✓  | 0.5157           | 0.3785        | 0.7853        | 0.4294       | 0.8882         | 0.7906          | 0.8109          | 0.6033          | 0.6364           |
| LLP + Ours(w/o CI)  | MixBag         | –  | 0.4582           | 0.2971        | 0.7884        | 0.4250       | 0.8898         | 0.7831          | 0.8189          | 0.5630          | 0.6280           |
| LLP + Ours(with CI) | MixBag         | ✓  | 0.5256           | 0.3742        | 0.7861        | 0.4347       | 0.9017         | 0.7971          | 0.8099          | 0.6197          | <b>0.6561</b>    |

Table 4. Accuracy on each dataset in different bag generation methods. Note that this table corresponds to Table 6 in the main paper, which shows the average accuracy of all datasets. LLP + Ours(MixBag with CI) was superior to the baseline LLP in almost all datasets under every condition.
